# Supplementary material
Source: PubMed Central journal article supplement (PMC3515026)
Supplement: chest_142_6_1508_ds01.pdf [file chest_142_6_1508_ds01.pdf]

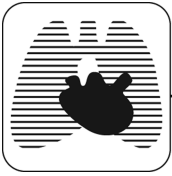

## Screening of Pediatric Sleep-Disordered Breathing

### A Proposed Unbiased Discriminative Set of Questions Using Clinical Severity Scales

Karen Spruyt, PhD; and David Gozal, MD, FCCP

#### e-Appendix 1.

##### Results

###### *Descriptive analyses*

Snoring is traditionally perceived as the primary symptom of SDB and a screening criteria applied to our selected community sample, we found the following prevalence; 21.7% never, 10.7% rarely, 14.9% occasionally, 16.6% frequently and 36.2% almost always. Further, there is a significant disparity of loudness of snoring per endorsement ( $\chi^2(20) = 1616.2, p = .00$ ): more specifically, for *rarely* 79.28% snores mildly quiet, 18.02% medium loud, 0.9% very loud and 1.8% extremely loud; for *occasionally* 49.36% snores mildly quiet, 44.23% medium loud, and 6.41% loud; for *frequently* 21.51% snores mildly quiet, 52.33% medium loud, 22.09% loud, and 4.07% very loud; and for children that *almost always* snore the loudness of their snoring was 6.08% mildly quiet, 24.87% medium loud, 26.98% loud and similar for very loud, and 15.08% extremely loud. Hence, the more frequently children are reported to snore, the louder they will snore.

###### **Per AHI cut-off groups**

Children were of similar age ( $6.8 \pm 0.7$  years) across the AHI cut-off groups (Online Supplement Table 1). When corrected for age and gender, children in AHI\_G6 had a significant higher BMI ( $21.7 \pm 6.2 \text{ kg/m}^2$ ) than children in AHI\_G1 ( $17.7 \pm 4.4 \text{ kg/m}^2$ ), AHI\_G2 ( $17.8 \pm 4.8 \text{ kg/m}^2$ ), and AHI\_G3 ( $18.5 \pm 4.4 \text{ kg/m}^2$ ) with no other groups being different in weight. Significantly, more African American children fell within the higher AHI cut-off groups (Online Supplement Table 1). Details of the NPSG results across the AHI cut-off groups can be found in Online Supplement Table 2; i.e., only the respiratory indices (AHI, AI, OAI, Nadir SaO<sub>2</sub>, respiratory arousal index) and sleep pressure score<sup>40</sup> being significantly different between them.

No significant differences between the AHI cut-off groups were found for the following parental reported physical complaints from the questionnaire; allergy, ADHD behavior and asthma or in the distribution of the remainder health questions of the questionnaire such as frequent colds and flu symptoms, or runny nose were found.

###### **Step 2: Mokken Scale Analysis (MSA)**

###### *MSA in total sample*

We ran a MSA on these 11 questions which indicated that only Factor 1 showed scalability properties in the total sample (Factor 2 had an  $H < 0.5$ ). Therefore, we assessed the Factor 1 scalability (or the order of

*Online supplements are not copyedited prior to posting.*



questions, or hereafter severity hierarchy of complaints) within each AHI cut-off groups. MSA of the 7 items of Factor 1 revealed a scale with medium scalability strength ( $H=0.57$ ) but good reliability ( $\rho$ ) of 0.86. Daytime mouth breathing showed a consistent bad fit regarding the statistical fit assumptions in the total sample and across the clinical AHI cut-off groups and was therefore omitted. This resulted in an increase of  $H$  (0.65) and reliability (0.88), and a hierarchy (Figure 1, dotted line for the total sample) of Shake child to breathe (Q1) (mean of 0.24,  $H=0.68$ ), Apnea during sleep (Q2) (mean of 0.58,  $H=0.65$ ), Struggle breathing when asleep (Q3) (mean of 0.81,  $H=0.66$ ), Breathing concerns while asleep (Q4) (mean of 1.18,  $H=0.68$ ), Loudness of snoring (Q5) (mean of 1.31,  $H=0.58$ ) and Q6 (mean of 2.81,  $H=0.67$ ) resulted. The weakest item ( $H$ ) was Loudness of snoring (Q5), as can also be visually seen by the decline in the monotonicity function per MSA (Figure 1).

### Step 3: ROC per question

When AHI cut-off groups are being compared; (based on their good accuracy) Loudness of snoring (Q5) discriminated between AHI\_G1 and AHI\_G6 when it was more than loud (>loud), i.e., sensitivity of 71.43% [53.7-85.4] and specificity 86.74% [83.5-89.6]; between AHI\_G2 and AHI\_G6 when it was more than loud (>loud), i.e., sensitivity of 71.43% [53.7-85.4] and specificity 82.69% [75.8-88.3]; between AHI\_G3 and AHI\_G6 when it was more than loud (>loud), i.e., sensitivity of 71.43% [53.7-85.4] and specificity 73.47% [58.9-85.1]. Snoring during sleep (Q6) had discriminatory power between AHI\_G1 and AHI\_G6 when it occurred more than 4 times per week (>frequently), i.e., sensitivity of 100% [89.7-100] and specificity 70.98% [67.4-74.4]; AHI\_G2 and AHI\_G6 when it occurred more than 4 times per week (>frequently), i.e., sensitivity of 100% [89.7-100] and specificity 66.84% [59.6-73.5]; and AHI\_G3 and AHI\_G6 when it occurred more than 4 times per week (>frequently), i.e., sensitivity of 100% [89.7-100] and specificity 57.89% [44.1-70.9]. The higher the AHI, the less specific these traditional cardinal symptoms were, a finding that closely concurred with the MSA (as can be seen on the figures).

Given the nature of our questionnaire, the findings overall indicate that none of the questions alone were sufficiently accurate to discriminate between *each* of AHI cut-off groups. This supported the MSA being suggestive that a set of questions was needed to more accurate discrimination along the clinical AHI severity groups.

Of interest, *a posteriori* we re-drew the ROC for the severity hierarchies in the AHI cut-off groups when children with parental reported asthma, allergies, colds, runny noses or weight problems were excluded, and as would be expected, this post-hoc verification indeed affected sensitivity and/or specificity.



**e-Table 1.** Descriptive information per AHI cut-off group in a community sample: Age, BMI and Ethnicity

|                  | AHI cut-off groups |                                 |              |                              |              |                              |              |                                 |              |                              | Anova | p-value                      |                   |                |
|------------------|--------------------|---------------------------------|--------------|------------------------------|--------------|------------------------------|--------------|---------------------------------|--------------|------------------------------|-------|------------------------------|-------------------|----------------|
|                  | AHI≤1              | 1>AHI≤2                         | 2>AHI≤3      | 3>AHI≤5                      | 5>AHI<10     | AHI≥10                       |              |                                 |              |                              |       |                              |                   |                |
|                  | Mean ±<br>sd       | Mean ±<br>sd                    | Mean ±<br>sd | Mean ±<br>sd                 | Mean ±<br>sd | Mean ±<br>sd                 | Mean ±<br>sd | Mean ±<br>sd                    | Mean ±<br>sd | Mean ±<br>sd                 |       |                              |                   |                |
|                  | n                  | CI 95%                          | CI 95%       | CI 95%                       | CI 95%       | CI 95%                       | CI 95%       | CI 95%                          | CI 95%       | CI 95%                       |       |                              |                   |                |
| <b>age</b>       | 687                | 6.8 ± 0.7<br>6.8 – 6.9          | 205          | 6.8 ± 0.7<br>6.7 – 6.9       | 66           | 6.9 ± 0.7<br>6.7 – 7.0       | 61           | 6.6 ± 0.6<br>6.5 – 6.8          | 60           | 6.8 ± 0.8<br>6.6 – 7.0       | 41    | 7.0 ± 0.9<br>6.7 – 7.3       | F(5,<br>1114)=1.3 | 0.28           |
| <b>BMI</b>       | 626                | 17.7 ±<br>4.4<br>17.3 –<br>18.0 | 184          | 17.8 ± 4.8<br>17.3 –<br>18.5 | 60           | 18.5 ± 4.4<br>17.4 –<br>19.7 | 49           | 19.5 ±<br>4.8<br>18.1 –<br>20.9 | 44           | 19.7 ± 5.5<br>18.0 –<br>21.3 | 34    | 21.7 ± 6.2<br>19.5 –<br>23.8 | F(5, 991)=7.3     | <b>0.00001</b> |
|                  | n                  | %*                              | %*           | %*                           | %*           | %*                           | %*           | %*                              | %*           | %*                           |       | Chi-square                   |                   |                |
| <b>Ethnicity</b> | 639                |                                 | 178          |                              | 56           |                              | 52           |                                 | 53           |                              | 36    |                              | $\chi^2(10)=35.9$ | <b>0.0001</b>  |
| WNH              |                    | 44.5                            |              | 11.5                         |              | 3.6                          |              | 3.3                             |              | 2.7                          |       | 1.4                          |                   |                |
| AA               |                    | 14.5                            |              | 3.7                          |              | 1.5                          |              | 1.4                             |              | 2.4                          |       | 1.7                          |                   |                |
| Other            |                    | 4.0                             |              | 2.3                          |              | 0.5                          |              | 0.5                             |              | 0.2                          |       | 0.5                          |                   |                |

Significant results in bold. \*percentage of Total Count (N=1014), **AHI**: Apnea Hypopnea Index, **AI**: Apnea Index, **OAI**: Obstructive Apnea Index, **SAI**:

Spontaneous Arousal Index, **RAI**: Respiratory Arousal Index, **SEI**: Sleep Efficiency Index, **SOL**: Sleep Onset Latency, **REM**: Rapid Eye Movement Sleep, **TST**:

total sleep time, **SWS**: Slow Wave Sleep, **SPS**: sleep pressure score, **BMI**: Body Mass Index: kg/m<sup>2</sup>, **WNH**: White Non-Hispanic, **AA**: African American,

**Other**: Mixed Ethnicity

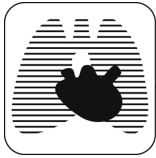

**e-Table 2.** NPSG sleep parameters per AHI cut-off group in the community sample

|                                 | AHI≤1 |                                | 1>AHI≤2 |                                | 2>AHI≤3 |                                | 3>AHI≤5 |                                | 5>AHI<10 |                               | AHI≥10 |                                | Kruskall-Wallis        | p-value       |
|---------------------------------|-------|--------------------------------|---------|--------------------------------|---------|--------------------------------|---------|--------------------------------|----------|-------------------------------|--------|--------------------------------|------------------------|---------------|
|                                 | n     | Mean ± sd<br>CI 95%            | n       | Mean ± sd<br>CI 95%            | n       | Mean ± sd<br>CI 95%            | n       | Mean ± sd<br>CI 95%            | n        | Mean ± sd<br>CI 95%           | n      | Mean ± sd<br>CI 95%            |                        |               |
| <b>AHI</b>                      | 695   | 0.4 ± 0.3<br>0.4 – 0.5         | 210     | 1.4 ± 0.3<br>1.3 – 1.4         | 66      | 2.5 ± 0.3<br>2.4 – 2.6         | 61      | 3.8 ± 0.5<br>3.6 – 3.9         | 60       | 6.9 ± 1.4<br>6.6 – 7.3        | 41     | 20.1 ± 9.5<br>17.1 – 23.1      | H(5,N=1133)<br>=863.8  | <b>0.0001</b> |
| <b>AI</b>                       | 695   | 0.4 ± 0.8<br>0.3 – 0.4         | 210     | 0.9 ± 0.5<br>0.8 – 1.0         | 66      | 1.2 ± 0.8<br>1.0 – 1.3         | 61      | 1.4 ± 0.9<br>1.1 – 1.6         | 60       | 1.8 ± 1.5<br>1.4 – 2.2        | 41     | 5.5 ± 7.0<br>3.3 – 7.7         | H(5,N= 1133)<br>=430.9 | <b>0.0001</b> |
| <b>OAI</b>                      | 695   | 0.1 ± 0.4<br>0.0 – 0.1         | 210     | 0.2 ± 0.1<br>0.1 – 0.2         | 66      | 0.3 ± 0.4<br>0.2 – 0.4         | 61      | 0.5 ± 0.6<br>0.4 – 0.7         | 60       | 1.1 ± 1.3<br>0.8 – 1.4        | 41     | 3.9 ± 3.7<br>2.7 – 5.1         | H(5,N= 1133)<br>=336.8 | <b>0.0001</b> |
| <b>Nadir SaO2</b>               | 695   | 93.0 ± 5.1<br>92.7 – 93.4      | 210     | 91.5 ± 3.6<br>91.0 – 92.0      | 66      | 90.1 ± 3.8<br>89.2 – 91.1      | 61      | 87.6 ± 6.6<br>86.0 – 89.3      | 60       | 85.3 ± 9.8<br>82.7 – 87.8     | 41     | 79.6 ± 10.9<br>76.2 – 83.1     | H(5,N= 1133)<br>=287.1 | <b>0.0001</b> |
| <b>SAI</b>                      | 695   | 7.9 ± 4.5<br>7.6 – 8.3         | 210     | 7.7 ± 4.5<br>7.1 – 8.3         | 66      | 8.2 ± 4.7<br>7.1 – 9.4         | 61      | 8.7 ± 6.7<br>7.0 – 10.4        | 60       | 6.4 ± 5.8<br>4.9 – 7.9        | 41     | 6.4 ± 5.0<br>4.9 – 8.0         | H(5,N= 1133)<br>=22.7  | <b>0.0004</b> |
| <b>RAI</b>                      | 695   | 0.8 ± 1.9<br>0.6 – 0.9         | 210     | 1.5 ± 4.2<br>0.9 – 2.0         | 66      | 1.8 ± 1.9<br>1.3 – 2.3         | 61      | 3.0 ± 3.3<br>2.2 – 3.9         | 60       | 4.7 ± 3.5<br>3.8 – 5.7        | 41     | 9.8 ± 6.4<br>7.8 – 11.9        | H(5,N= 1133)<br>=285.5 | <b>0.0001</b> |
| <b>SEI</b>                      | 692   | 89.8 ± 7.3<br>89.3 – 90.4      | 210     | 90.1 ± 8.1<br>89.0 – 91.2      | 66      | 90.7 ± 8.1<br>88.7 – 92.7      | 61      | 90.0 ± 9.4<br>87.6 – 92.4      | 60       | 90.9 ± 7.2<br>89.0 – 92.8     | 41     | 88.3 ± 10.7<br>84.9 – 91.7     | H(5,N= 1130)<br>=5.7   | 0.34          |
| <b>SOL (min)</b>                | 695   | 22.8 ± 23.0<br>21.1 – 24.5     | 210     | 23.4 ± 26.8<br>19.8 – 27.1     | 66      | 20.8 ± 21.7<br>15.5 – 26.1     | 61      | 20.2 ± 21.4<br>14.7 – 25.6     | 60       | 19.4 ± 26.0<br>12.7 – 26.2    | 41     | 16.6 ± 17.3<br>11.1 – 22.0     | H(5,N= 1133)<br>=9.5   | 0.10          |
| <b>REM latency (min)</b>        | 694   | 145.2 ± 63.02<br>140.5 – 149.9 | 210     | 144.6 ± 61.90<br>136.2 – 153.0 | 66      | 149.2 ± 79.83<br>129.5 – 168.8 | 61      | 148.6 ± 68.62<br>131.0 – 166.2 | 60       | 147.0 ± 54.4<br>132.9 – 161.1 | 41     | 162.8 ± 86.71<br>135.4 – 190.2 | H (5,N= 1132)<br>=0.9  | 0.98          |
| <b>total sleep time (hours)</b> | 695   | 7.9 ± 0.8<br>7.9 – 8.0         | 210     | 7.9 ± 0.8<br>7.8 – 8.0         | 66      | 7.9 ± 0.9<br>7.6 – 8.1         | 61      | 7.9 ± 0.9<br>7.7 – 8.2         | 60       | 7.9 ± 0.7<br>7.7 – 8.1        | 41     | 7.8 ± 1.0<br>7.5 – 8.1         | H(5,N= 1133)<br>=2.6   | 0.75          |
| <b>awake (%TST)</b>             | 695   | 8.6 ± 7.8<br>8.0 – 9.2         | 210     | 7.4 ± 8.4<br>6.3 – 8.6         | 65      | 7.2 ± 7.7<br>5.3 – 9.1         | 60      | 6.5 ± 7.5<br>4.6 – 8.5         | 60       | 6.8 ± 8.0<br>4.8 – 8.9        | 41     | 9.3 ± 10.7<br>5.9 – 12.6       | H(5,N= 1131)<br>=23.5  | <b>0.0003</b> |
| <b>Stage 1 (%TST)</b>           | 695   | 6.5 ± 4.9<br>6.1 – 6.8         | 210     | 6.3 ± 6.1<br>5.5 – 7.1         | 66      | 6.7 ± 7.5<br>4.9 – 8.5         | 61      | 7.8 ± 7.8<br>5.8 – 9.8         | 60       | 6.6 ± 6.3<br>4.9 – 8.2        | 41     | 8.4 ± 7.3<br>6.1 – 10.7        | H(5,N= 1133)<br>=7.4   | 0.20          |
| <b>Stage 2 (%TST)</b>           | 695   | 47.0 ± 14.0<br>45.9 – 48.0     | 210     | 45.4 ± 9.1<br>44.1 – 46.6      | 66      | 44.7 ± 8.6<br>42.6 – 46.8      | 61      | 45.0 ± 8.9<br>42.7 – 47.3      | 60       | 45.5 ± 6.8<br>43.7 – 47.3     | 41     | 43.7 ± 10.4<br>40.4 – 47.0     | H(5,N= 1133)<br>=9.4   | 0.10          |
| <b>SWS (%TST)</b>               | 693   | 26.4 ± 11.5<br>25.5 – 27.2     | 210     | 26.6 ± 8.4<br>25.5 – 27.8      | 66      | 28.4 ± 9.3<br>26.1 – 30.7      | 61      | 25.9 ± 8.1<br>23.8 – 28.0      | 60       | 29.0 ± 33.2<br>20.5 – 37.6    | 41     | 25.7 ± 7.9<br>23.2 – 28.2      | H(5,N= 1131)<br>=4.5   | 0.48          |
| <b>REM (%TST)</b>               | 695   | 21.0 ± 9.2<br>20.3 – 21.7      | 210     | 21.4 ± 8.4<br>20.3 – 22.5      | 66      | 21.0 ± 10.5<br>18.4 – 23.6     | 61      | 19.9 ± 6.3<br>18.3 – 21.5      | 60       | 23.1 ± 16.1<br>18.9 – 27.2    | 41     | 19.2 ± 13.4<br>14.9 – 23.4     | H(5,N= 1133)<br>=10.2  | 0.07          |
| <b>SPS</b>                      | 693   | 0.0 ± 0.7<br>0.0 – 0.1         | 208     | 0.1 ± 0.3<br>0.0 – 0.1         | 66      | 0.1 ± 0.1<br>0.0 – 0.1         | 61      | 0.1 ± 0.2<br>0.1 – 0.2         | 60       | 0.3 ± 0.3<br>0.2 – 0.3        | 41     | 0.4 ± 0.3<br>0.3 – 0.5         | H(5,N= 1129)<br>=267.1 | <b>0.0001</b> |

Significant results in bold, **AHI**: Apnea Hypopnea Index, **AI**: Apnea Index, **OAI**: Obstructive Apnea Index, **SAI**: Spontaneous Arousal Index, **RAI**: Respiratory Arousal Index, **SEI**: Sleep Efficiency Index,

**SOL**: Sleep Onset Latency, **REM**: Rapid Eye Movement Sleep, **TST**: total sleep time, **SWS**: Slow Wave Sleep, **SPS**: sleep pressure score

*Online supplements are not copyedited prior to posting.*



**e-Table 3.** ROC's for the 11 questions in the clinical AHI cut-off groups

Q1-Q4, Q6 :Likert-type responses 'never'[0], 'rarely' (once per week)[1], 'occasionally' (twice per week)[2], 'frequently' (three to four times per week) [3] and 'almost always' (>4 times per week) [4] for the preceding 6 month timeframe. Loudness of snoring (Q5): 'mildly quiet'[0], 'medium loud'[1], 'loud'[2], 'very loud'[3], 'extremely loud' [4]

| <b>Q1: Shake child to breathe</b> |                  |                      |                |                                |                                |                                      |                                      |
|-----------------------------------|------------------|----------------------|----------------|--------------------------------|--------------------------------|--------------------------------------|--------------------------------------|
| <b>Group 1: AHI≤1 vs.</b>         | <b>Criterion</b> | <b>AUC Mean ± SE</b> | <b>p-value</b> | <b>Sensitivity mean 95% CI</b> | <b>Specificity mean 95% CI</b> | <b>Negative Predictive Value (%)</b> | <b>Positive Predictive Value (%)</b> |
| <b>Group 2:</b>                   | >0               | 0.518 ± 0.0240       | 0.4664         | 10.64                          | 92.99                          | 78.4                                 | 30.3                                 |
| 1>AHI≤2                           |                  | 0.483 to 0.552       |                | 6.6 - 16.0                     | 90.8 - 94.8                    |                                      |                                      |
| <b>Group 3:</b>                   | >0               | 0.580 ± 0.0410       | 0.0518         | 22.81                          | 92.99                          | 93.3                                 | 22.0                                 |
| 2>AHI≤3                           |                  | 0.543 to 0.616       |                | 12.7 - 35.8                    | 90.8 - 94.8                    |                                      |                                      |
| <b>Group 4:</b>                   | >0               | 0.534 ± 0.0405       | 0.3993         | 14.04                          | 92.99                          | 92.6                                 | 14.8                                 |
| 3>AHI≤5                           |                  | 0.497 to 0.571       |                | 6.3 - 25.8                     | 90.8 - 94.8                    |                                      |                                      |
| <b>Group 5:</b>                   | >0               | 0.600 ± 0.0429       | 0.0197         | 26.92                          | 92.99                          | 94.1                                 | 23.3                                 |
| 5>AHI<10                          |                  | 0.563 to 0.636       |                | 15.6 - 41.0                    | 90.8 - 94.8                    |                                      |                                      |
| <b>Group 6: AHI≥10</b>            | >0               | 0.682 ± 0.0509       | 0.0003         | 42.86                          | 92.99                          | 96.8                                 | 24.6                                 |
|                                   |                  | 0.646 to 0.717       |                | 26.3 - 60.6                    | 90.8 - 94.8                    |                                      |                                      |
| <b>Group 2:</b>                   |                  |                      |                |                                |                                |                                      |                                      |
| 1>AHI≤2 vs.                       |                  |                      |                |                                |                                |                                      |                                      |
| <b>Group 3:</b>                   | >0               | 0.564 ± 0.0443       | 0.1471         | 22.81                          | 89.36                          | 79.2                                 | 39.4                                 |
| 2>AHI≤3                           |                  | 0.500 to 0.627       |                | 12.7 - 35.8                    | 84.0 - 93.4                    |                                      |                                      |
| <b>Group 4:</b>                   | >0               | 0.517 ± 0.0440       | 0.7040         | 14.04                          | 89.36                          | 77.4                                 | 28.6                                 |
| 3>AHI≤5                           |                  | 0.452 to 0.581       |                | 6.3 - 25.8                     | 84.0 - 93.4                    |                                      |                                      |
| <b>Group 5:</b>                   | >0               | 0.584 ± 0.0459       | 0.0669         | 26.92                          | 89.36                          | 41.2                                 | 81.6                                 |
| 5>AHI<10                          |                  | 0.519 to 0.647       |                | 15.6 - 41.0                    | 84.0 - 93.4                    |                                      |                                      |
| <b>Group 6: AHI≥10</b>            | >0               | 0.670 ± 0.0533       | 0.0015         | 42.86                          | 89.36                          | 42.9                                 | 89.4                                 |
|                                   |                  | 0.604 to 0.731       |                | 26.3 - 60.6                    | 84.0 - 93.4                    |                                      |                                      |
| <b>Group 3:</b>                   |                  |                      |                |                                |                                |                                      |                                      |
| 2>AHI≤3 vs.                       |                  |                      |                |                                |                                |                                      |                                      |
| <b>Group 4:</b>                   | ≤0               | 0.548 ± 0.540        | 0.3693         | 85.96                          | 22.81                          | 52.7                                 | 61.9                                 |
| 3>AHI≤5                           |                  | 0.453 to 0.642       |                | 74.2 - 93.7                    | 12.7 - 35.8                    |                                      |                                      |
| <b>Group 5:</b>                   | >0               | 0.520 ± 0.0556       | 0.7248         | 26.92                          | 77.19                          | 51.9                                 | 53.7                                 |
| 5>AHI<10                          |                  | 0.422 to 0.616       |                | 15.6 - 41.0                    | 64.2 - 87.3                    |                                      |                                      |
| <b>Group 6: AHI≥10</b>            | >0               | 0.606 ± 0.0616       | 0.0847         | 42.86                          | 77.19                          | 53.6                                 | 68.7                                 |
|                                   |                  | 0.499 to 0.707       |                | 26.3 - 60.6                    | 64.2 - 87.3                    |                                      |                                      |
| <b>Group 4:</b>                   |                  |                      |                |                                |                                |                                      |                                      |
| 3>AHI≤5 vs.                       |                  |                      |                |                                |                                |                                      |                                      |
| <b>Group 5:</b>                   | >0               | 0.568 ± 0.0551       | 0.2138         | 26.92                          | 85.96                          | 63.6                                 | 56.3                                 |
| 5>AHI<10                          |                  | 0.470 to 0.663       |                | 15.6 - 41.0                    | 74.2 - 93.7                    |                                      |                                      |
| <b>Group 6: AHI≥10</b>            | >0               | 0.656 ± 0.0601       | 0.0096         | 42.86                          | 85.96                          | 65.2                                 | 71.0                                 |
|                                   |                  | 0.549 to 0.752       |                | 26.3 - 60.6                    | 74.2 - 93.7                    |                                      |                                      |
| <b>Group 5:</b>                   |                  |                      |                |                                |                                |                                      |                                      |
| 5>AHI<10 vs.                      |                  |                      |                |                                |                                |                                      |                                      |
| <b>Group 6: AHI≥10</b>            | >0               | 0.572 ± 0.0636       | 0.2551         | 41.18                          | 71.70                          | 48.3                                 | 65.5                                 |
|                                   |                  | 0.462 to 0.678       |                | 24.6 - 59.3                    | 57.7 - 83.2                    |                                      |                                      |

**AUC:** Area Under Curve, **AHI:** Apnea Hypopnea Index

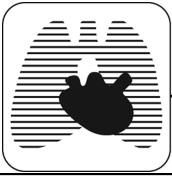

| Q2: Apnea during sleep          |           |                                                |               |                                    |                                    |                               |                               |
|---------------------------------|-----------|------------------------------------------------|---------------|------------------------------------|------------------------------------|-------------------------------|-------------------------------|
| Group 1: AHI≤1 vs.              | Criterion | AUC Mean ± SE<br>95% CI                        | p-value       | Sensitivity mean<br>95% CI         | Specificity mean<br>95% CI         | Negative Predictive Value (%) | Positive Predictive Value (%) |
| <b>Group 2:</b><br>1>AHI≤2      | >1        | 0.518 ± 0.0245<br>0.483 to 0.553               | 0.4656        | 12.09<br>7.7 - 17.7                | 91.47<br>89.0 - 93.5               | 29.3                          | 78.0                          |
| <b>Group 3:</b><br>2>AHI≤3      | >0        | 0.585 ± 0.0425<br>0.547 to 0.623               | 0.0451        | 35.85<br>23.1 - 50.2               | 81.96<br>78.7 - 84.9               | 14.5                          | 93.7                          |
| <b>Group 4:</b><br>3>AHI≤5      | >0        | 0.605 ± 0.0422<br>0.567 to 0.642               | 0.0129        | 37.04<br>24.3 - 51.3               | 81.96<br>78.7 - 84.9               | 15.2                          | 93.7                          |
| <b>Group 5:</b><br>5>AHI<10     | >0        | 0.672 ± 0.0432<br>0.635 to 0.707               | 0.0001        | 50.00<br>35.5 - 64.5               | 81.96<br>78.7 - 84.9               | 18.2                          | 95.3                          |
| <b>Group 6:</b> AHI≥10          | >0        | <b>0.856 ± 0.0412</b><br><b>0.827 to 0.882</b> | <b>0.0001</b> | <b>82.35</b><br><b>65.5 - 93.2</b> | <b>81.96</b><br><b>78.7 - 84.9</b> | <b>20.0</b>                   | <b>98.8</b>                   |
| <b>Group 2:</b><br>1>AHI≤2 vs.  |           |                                                |               |                                    |                                    |                               |                               |
| <b>Group 3:</b><br>2>AHI≤3      | >0        | 0.565 ± 0.0457<br>0.499 to 0.629               | 0.1553        | 35.85<br>23.1 - 50.2               | 78.57<br>71.9 - 84.3               | 32.8                          | 80.8                          |
| <b>Group 4:</b><br>3>AHI≤5      | >0        | 0.589 ± 0.0454<br>0.523 to 0.652               | 0.0506        | 37.04<br>24.3 - 51.3               | 78.57<br>71.9 - 84.3               | 33.9                          | 80.8                          |
| <b>Group 5:</b><br>5>AHI<10     | >0        | 0.655 ± 0.0460<br>0.590 to 0.716               | 0.0007        | 50.00<br>35.5 - 64.5               | 78.57<br>71.9 - 84.3               | 39.1                          | 85.1                          |
| <b>Group 6:</b> AHI≥10          | >0        | <b>0.844 ± 0.0434</b><br><b>0.788 to 0.889</b> | <b>0.0001</b> | <b>82.35</b><br><b>65.5 - 93.2</b> | <b>78.57</b><br><b>71.9 - 84.3</b> | <b>41.8</b>                   | <b>96.0</b>                   |
| <b>Group 3:</b><br>2>AHI≤3 vs.  |           |                                                |               |                                    |                                    |                               |                               |
| <b>Group 4:</b><br>3>AHI≤5      | >2        | 0.531 ± 0.0559<br>0.432 to 0.628               | 0.5847        | 18.52<br>9.3 - 31.4                | 96.23<br>87.0 - 99.5               | 83.3                          | 53.7                          |
| <b>Group 5:</b><br>5>AHI<10     | >1        | 0.603 ± 0.0558<br>0.502 to 0.698               | 0.0639        | 34.00<br>21.2 - 48.8               | 86.79<br>74.7 - 94.5               | 70.8                          | 58.2                          |
| <b>Group 6:</b> AHI≥10          | >1        | <b>0.812 ± 0.0500</b><br><b>0.714 to 0.888</b> | <b>0.0001</b> | <b>67.65</b><br><b>49.5 - 82.6</b> | <b>86.79</b><br><b>74.7 - 94.5</b> | <b>76.7</b>                   | <b>80.7</b>                   |
| <b>Group 4:</b><br>3>AHI≤5 vs.  |           |                                                |               |                                    |                                    |                               |                               |
| <b>Group 5:</b><br>5>AHI<10     | >0        | 0.562 ± 0.0565<br>0.462 to 0.660               | 0.2692        | 50.00<br>35.5 - 64.5               | 62.96<br>48.7 - 75.7               | 55.6                          | 57.6                          |
| <b>Group 6:</b> AHI≥10          | >0        | <b>0.747 ± 0.0559</b><br><b>0.643 to 0.834</b> | <b>0.0001</b> | <b>82.35</b><br><b>65.5 - 93.2</b> | <b>62.96</b><br><b>48.7 - 75.7</b> | <b>58.3</b>                   | <b>85.0</b>                   |
| <b>Group 5:</b><br>5>AHI<10 vs. |           |                                                |               |                                    |                                    |                               |                               |
| <b>Group 6:</b> AHI≥10          | >1        | 0.703 ± 0.0600<br>0.593 to 0.797               | 0.0007        | 69.70<br>51.3 - 84.4               | 66.67<br>52.1 - 79.2               | 57.5                          | 77.3                          |

AUC: Area Under Curve, AHI: Apnea Hypopnea Index

*Online supplements are not copyedited prior to posting.*



### Q3: Struggle breathing when asleep

| Group 1: AHI≤1 vs.              | Criterion | AUC<br>Mean ± SE<br>95% CI                     | p-value       | Sensitivity<br>mean<br>95% CI      | Specificity<br>mean<br>95% CI      | Negative<br>Predictive Value<br>(%) | Positive<br>Predictive Value<br>(%) |
|---------------------------------|-----------|------------------------------------------------|---------------|------------------------------------|------------------------------------|-------------------------------------|-------------------------------------|
| <b>Group 2:</b><br>1>AHI≤2      | >0        | 0.522 ± 0.0244<br>0.488 to 0.557               | 0.3565        | 33.33<br>26.6 - 40.7               | 71.34<br>67.7 - 74.8               | 78.4                                | 25.2                                |
| <b>Group 3:</b><br>2>AHI≤3      | >0        | 0.571 ± 0.0424<br>0.533 to 0.608               | 0.0933        | 43.40<br>29.8 - 57.7               | 71.34<br>67.7 - 74.8               | 93.9                                | 11.1                                |
| <b>Group 4:</b><br>3>AHI≤5      | >0        | 0.621 ± 0.0414<br>0.584 to 0.657               | 0.0034        | 51.79<br>38.0 - 65.3               | 71.34<br>67.7 - 74.8               | 94.4                                | 13.6                                |
| <b>Group 5:</b><br>5>AHI<10     | >1        | 0.681 ± 0.0429<br>0.645 to 0.715               | 0.0001        | 50.00<br>35.5 - 64.5               | 85.20<br>82.2 - 87.9               | 95.6                                | 20.8                                |
| <b>Group 6: AHI≥10</b>          | >1        | <b>0.807 ± 0.0450</b><br><b>0.776 to 0.836</b> | <b>0.0001</b> | <b>74.29</b><br><b>56.7 - 87.5</b> | <b>85.20</b><br><b>82.2 - 87.9</b> | <b>98.4</b>                         | <b>21.5</b>                         |
| <b>Group 2:</b><br>1>AHI≤2 vs.  |           |                                                |               |                                    |                                    |                                     |                                     |
| <b>Group 3:</b><br>2>AHI≤3      | >0        | 0.548 ± 0.547<br>0.483 to 0.613                | 0.2885        | 43.40<br>29.8 - 57.7               | 66.67<br>59.3 - 73.4               | 80.3                                | 27.4                                |
| <b>Group 4:</b><br>3>AHI≤5      | >0        | 0.600 ± 0.0446<br>0.535 to 0.663               | 0.0245        | 51.79<br>38.0 - 65.3               | 66.67<br>59.3 - 73.4               | 81.9                                | 32.2                                |
| <b>Group 5:</b><br>5>AHI<10     | >1        | 0.667 ± 0.0457<br>0.602 to 0.727               | 0.0003        | 50.00<br>35.5 - 64.5               | 82.51<br>76.2 - 87.7               | 85.8                                | 43.9                                |
| <b>Group 6: AHI≥10</b>          | >1        | <b>0.800 ± 0.0467</b><br><b>0.741 to 0.851</b> | <b>0.0001</b> | <b>74.29</b><br><b>56.7 - 87.5</b> | <b>82.51</b><br><b>76.2 - 87.7</b> | <b>94.4</b>                         | <b>44.8</b>                         |
| <b>Group 3:</b><br>2>AHI≤3 vs.  |           |                                                |               |                                    |                                    |                                     |                                     |
| <b>Group 4:</b><br>3>AHI≤5      | >3        | 0.554 ± 0.0551<br>0.456 to 0.650               | 0.3235        | 12.50<br>5.2 - 24.1                | 96.23<br>87.0 - 99.5               | 51.0                                | 77.8                                |
| <b>Group 5:</b><br>5>AHI<10     | >1        | 0.633 ± 0.0549<br>0.532 to 0.726               | 0.0154        | 50.00<br>35.5 - 64.5               | 77.36<br>63.8 - 87.7               | 62.1                                | 67.6                                |
| <b>Group 6: AHI≥10</b>          | >1        | <b>0.778 ± 0.0528</b><br><b>0.677 to 0.860</b> | <b>0.0001</b> | <b>74.29</b><br><b>56.7 - 87.5</b> | <b>77.36</b><br><b>63.8 - 87.7</b> | <b>82.0</b>                         | <b>68.4</b>                         |
| <b>Group 4:</b><br>3>AHI≤5 vs.  |           |                                                |               |                                    |                                    |                                     |                                     |
| <b>Group 5:</b><br>5>AHI<10     | >1        | 0.578 ± 0.0558<br>0.478 to 0.673               | 0.1636        | 50.00<br>35.5 - 64.5               | 71.43<br>57.8 - 82.7               | 61.5                                | 61.0                                |
| <b>Group 6: AHI≥10</b>          | >1        | <b>0.723 ± 0.0567</b><br><b>0.619 to 0.811</b> | <b>0.0001</b> | <b>74.29</b><br><b>56.7 - 87.5</b> | <b>71.43</b><br><b>57.8 - 82.7</b> | <b>81.6</b>                         | <b>61.9</b>                         |
| <b>Group 5:</b><br>5>AHI<10 vs. |           |                                                |               |                                    |                                    |                                     |                                     |
| <b>Group 6: AHI≥10</b>          | >2        | 0.645 ± 0.0621<br>0.534 to 0.746               | 0.0196        | 52.94<br>35.1 - 70.2               | 70.59<br>56.2 - 82.5               | 69.2                                | 54.5                                |

AUC: Area Under Curve, AHI: Apnea Hypopnea Index



### Q4: Breathing concerns while asleep

| Group 1: AHI≤1 vs.              | Criterion | AUC<br>Mean ± SE<br>95% CI                     | p-value       | Sensitivity<br>mean<br>95% CI      | Specificity<br>mean<br>95% CI      | Negative<br>Predictive Value<br>(%) | Positive<br>Predictive Value<br>(%) |
|---------------------------------|-----------|------------------------------------------------|---------------|------------------------------------|------------------------------------|-------------------------------------|-------------------------------------|
| <b>Group 2:</b><br>1>AHI≤2      | >1        | 0.546 ± 0.0243<br>0.511 to 0.580               | 0.0602        | 32.97<br>26.3 - 40.3               | 76.88<br>73.4 - 80.1               | 80.2                                | 28.8                                |
| <b>Group 3:</b><br>2>AHI≤3      | >0        | 0.593 ± 0.0414<br>0.555 to 0.629               | 0.0253        | 53.57<br>39.7 - 67.0               | 62.94<br>59.1 - 66.7               | 94.1                                | 11.0                                |
| <b>Group 4:</b><br>3>AHI≤5      | >1        | 0.669 ± 0.0409<br>0.633 to 0.703               | 0.0001        | 51.79<br>38.0 - 65.3               | 76.88<br>73.4 - 80.1               | 94.9                                | 16.1                                |
| <b>Group 5:</b><br>5>AHI<10     | >2        | 0.740 ± 0.0408<br>0.706 to 0.772               | 0.0001        | 50.98<br>36.6 - 65.2               | 87.29<br>84.5 - 89.7               | 95.8                                | 23.9                                |
| <b>Group 6:</b> AHI≥10          | >1        | <b>0.898 ± 0.0353</b><br><b>0.873 to 0.920</b> | <b>0.0001</b> | <b>94.29</b><br><b>80.8 - 99.3</b> | <b>76.88</b><br><b>73.4 - 80.1</b> | <b>99.6</b>                         | <b>17.9</b>                         |
| <b>Group 2:</b><br>1>AHI≤2 vs.  |           |                                                |               |                                    |                                    |                                     |                                     |
| <b>Group 3:</b><br>2>AHI≤3      | >0        | 0.547 ± 0.0446<br>0.481 to 0.611               | 0.2960        | 53.57<br>39.7 - 67.0               | 55.14<br>47.7 - 62.4               | 79.7                                | 26.5                                |
| <b>Group 4:</b><br>3>AHI≤5      | >3        | 0.631 ± 0.0442<br>0.566 to 0.692               | 0.0032        | 32.14<br>20.3 - 46.0               | 90.81<br>85.7 - 94.6               | 81.6                                | 51.4                                |
| <b>Group 5:</b><br>5>AHI<10     | >2        | 0.704 ± 0.0442<br>0.641 to 0.761               | 0.0001        | 50.98<br>36.6 - 65.2               | 84.32<br>78.3 - 89.2               | 86.2                                | 47.3                                |
| <b>Group 6:</b> AHI≥10          | >2        | <b>0.877 ± 0.0389</b><br><b>0.826 to 0.917</b> | <b>0.0001</b> | <b>82.86</b><br><b>66.4 - 93.4</b> | <b>84.32</b><br><b>78.3 - 89.2</b> |                                     |                                     |
| <b>Group 3:</b><br>2>AHI≤3 vs.  |           |                                                |               |                                    |                                    |                                     |                                     |
| <b>Group 4:</b><br>3>AHI≤5      | >3        | 0.589 ± 0.0537<br>0.492 to 0.681               | 0.0991        | 32.14<br>20.3 - 46.0               | 85.71<br>73.8 - 93.6               | 55.8                                | 69.2                                |
| <b>Group 5:</b><br>5>AHI<10     | >2        | 0.662 ± 0.0528<br>0.564 to 0.750               | 0.0022        | 50.98<br>36.6 - 65.2               | 78.57<br>65.6 - 88.4               | 63.8                                | 68.4                                |
| <b>Group 6:</b> AHI≥10          | >2        | <b>0.842 ± 0.0457</b><br><b>0.750 to 0.910</b> | <b>0.0001</b> | <b>82.86</b><br><b>66.4 - 93.4</b> | <b>78.57</b><br><b>65.6 - 88.4</b> | <b>88.0</b>                         | <b>70.7</b>                         |
| <b>Group 4:</b><br>3>AHI≤5 vs.  |           |                                                |               |                                    |                                    |                                     |                                     |
| <b>Group 5:</b><br>5>AHI<10     | >2        | 0.563 ± 0.0557<br>0.464 to 0.659               | 0.2578        | 50.98<br>36.6 - 65.2               | 62.50<br>48.5 - 75.1               | 58.3                                | 55.3                                |
| <b>Group 6:</b> AHI≥10          | >2        | 0.732 ± 0.0561<br>0.629 to 0.819               | 0.0001        | 82.86<br>66.4 - 93.4               | 62.50<br>48.5 - 75.1               | 85.4                                | 58.0                                |
| <b>Group 5:</b><br>5>AHI<10 vs. |           |                                                |               |                                    |                                    |                                     |                                     |
| <b>Group 6:</b> AHI≥10          | >1        | 0.686 ± 0.0601<br>0.576 to 0.781               | 0.0020        | 94.12<br>80.3 - 99.3               | 38.46<br>25.3 - 53.0               | 90.9                                | 50.0                                |

AUC: Area Under Curve, AHI: Apnea Hypopnea Index



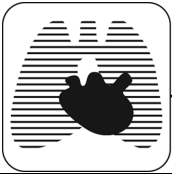

| Q5: Snore loudness              |           |                                                |               |                                    |                                    |                                     |                                     |
|---------------------------------|-----------|------------------------------------------------|---------------|------------------------------------|------------------------------------|-------------------------------------|-------------------------------------|
| Group 1: AHI≤1 vs.              | Criterion | AUC<br>Mean ± SE<br>95% CI                     | p-value       | Sensitivity<br>mean<br>95% CI      | Specificity<br>mean<br>95% CI      | Negative<br>Predictive Value<br>(%) | Positive<br>Predictive Value<br>(%) |
| <b>Group 2:</b><br>1>AHI≤2      | >0        | 0.556 ± 0.0267<br>0.517 to 0.594               | 0.0374        | 71.15<br>63.4 - 78.1               | 37.43<br>33.2 - 41.8               | 81.0                                | 25.7                                |
| <b>Group 3:</b><br>2>AHI≤3      | >0        | 0.642 ± 0.0442<br>0.601 to 0.682               | 0.0013        | 85.71<br>72.8 - 94.1               | 37.43<br>33.2 - 41.8               | 96.5                                | 11.6                                |
| <b>Group 4:</b><br>3>AHI≤5      | >0        | 0.660 ± 0.0417<br>0.620 to 0.699               | 0.0001        | 85.45<br>73.3 - 93.5               | 37.43<br>33.2 - 41.8               | 96.0                                | 12.8                                |
| <b>Group 5:</b><br>5>AHI<10     | >2        | 0.712 ± 0.0432<br>0.672 to 0.749               | 0.0001        | 45.83<br>31.4 - 60.8               | 86.74<br>83.5 - 89.6               | 94.5                                | 24.4                                |
| <b>Group 6:</b> AHI≥10          | >2        | <b>0.847 ± 0.0416</b><br><b>0.814 to 0.876</b> | <b>0.0001</b> | <b>71.43</b><br><b>53.7 - 85.4</b> | <b>86.74</b><br><b>83.5 - 89.6</b> | <b>97.8</b>                         | <b>26.9</b>                         |
| <b>Group 2:</b><br>1>AHI≤2 vs.  |           |                                                |               |                                    |                                    |                                     |                                     |
| <b>Group 3:</b><br>2>AHI≤3      | >0        | 0.587 ± 0.0479<br>0.516 to 0.655               | 0.0706        | 85.71<br>72.8 - 94.1               | 28.85<br>21.9 - 36.6               | 86.5                                | 27.5                                |
| <b>Group 4:</b><br>3>AHI≤5      | >0        | 0.608 ± 0.0456<br>0.539 to 0.674               | 0.0178        | 85.45<br>73.3 - 93.5               | 28.85<br>21.9 - 36.6               | 84.9                                | 29.7                                |
| <b>Group 5:</b><br>5>AHI<10     | >2        | 0.668 ± 0.0471<br>0.599 to 0.732               | 0.0004        | 45.83<br>31.4 - 60.8               | 82.69<br>75.8 - 88.3               | 83.2                                | 44.9                                |
| <b>Group 6:</b> AHI≥10          | >2        | <b>0.819 ± 0.0454</b><br><b>0.757 to 0.871</b> | <b>0.0001</b> | <b>71.43</b><br><b>53.7 - 85.4</b> | <b>82.69</b><br><b>75.8 - 88.3</b> | <b>92.8</b>                         | <b>48.1</b>                         |
| <b>Group 3:</b><br>2>AHI≤3 vs.  |           |                                                |               |                                    |                                    |                                     |                                     |
| <b>Group 4:</b><br>3>AHI≤5      | >3        | 0.527 ± 0.0568<br>0.427 to 0.626               | 0.6289        | 14.55<br>6.5 - 26.7                | 93.88<br>83.1 - 98.7               | 49.5                                | 72.7                                |
| <b>Group 5:</b><br>5>AHI<10     | >2        | 0.597 ± 0.0576<br>0.493 to 0.696               | 0.0910        | 45.83<br>31.4 - 60.8               | 73.47<br>58.9 - 85.1               | 58.1                                | 62.9                                |
| <b>Group 6:</b> AHI≥10          | >2        | <b>0.770 ± 0.0540</b><br><b>0.666 to 0.855</b> | <b>0.0001</b> | <b>71.43</b><br><b>53.7 - 85.4</b> | <b>73.47</b><br><b>58.9 - 85.1</b> | <b>78.3</b>                         | <b>65.8</b>                         |
| <b>Group 4:</b><br>3>AHI≤5 vs.  |           |                                                |               |                                    |                                    |                                     |                                     |
| <b>Group 5:</b><br>5>AHI<10     | >2        | 0.566 ± 0.0569<br>0.464 to 0.663               | 0.2492        | 45.83<br>31.4 - 60.8               | 70.91<br>57.1 - 82.4               | 60.0                                | 57.9                                |
| <b>Group 6:</b> AHI≥10          | >2        | 0.730 ± 0.0564<br>0.626 to 0.818               | 0.0001        | 71.43<br>53.7 - 85.4               | 70.91<br>57.1 - 82.4               | 79.6                                | 61.0                                |
| <b>Group 5:</b><br>5>AHI<10 vs. |           |                                                |               |                                    |                                    |                                     |                                     |
| <b>Group 6:</b> AHI≥10          | >1        | 0.654 ± 0.0622<br>0.542 to 0.755               | 0.0133        | 85.29<br>68.9 - 95.0               | 40.82<br>27.0 - 55.8               | 80.0                                | 50.0                                |

AUC: Area Under Curve, AHI: Apnea Hypopnea Index



### Q6: Snoring during sleep

| Group 1: AHI≤1 vs.              | Criterion | AUC<br>Mean ± SE<br>95% CI                     | p-value       | Sensitivity<br>mean<br>95% CI        | Specificity<br>mean<br>95% CI      | Negative<br>Predictive Value<br>(%) | Positive<br>Predictive Value<br>(%) |
|---------------------------------|-----------|------------------------------------------------|---------------|--------------------------------------|------------------------------------|-------------------------------------|-------------------------------------|
| <b>Group 2:</b><br>1>AHI≤2      | >1        | 0.554 ± 0.0242<br>0.520 to 0.588               | 0.0261        | 70.59<br>63.5 - 77.0                 | 39.10<br>35.4 - 42.9               | 82.5                                | 24.6                                |
| <b>Group 3:</b><br>2>AHI≤3      | >1        | 0.594 ± 0.0410<br>0.557 to 0.630               | 0.0215        | 77.19<br>64.2 - 87.3                 | 39.10<br>35.4 - 42.9               | 95.2                                | 9.8                                 |
| <b>Group 4:</b><br>3>AHI≤5      | >2        | 0.701 ± 0.0399<br>0.666 to 0.734               | 0.0001        | 77.19<br>64.2 - 87.3                 | 54.74<br>50.9 - 58.6               | 96.6                                | 12.8                                |
| <b>Group 5:</b><br>5>AHI<10     | >3        | 0.722 ± 0.0414<br>0.688 to 0.755               | 0.0001        | 64.71<br>50.1 - 77.6                 | 70.98<br>67.4 - 74.4               | 96.3                                | 14.6                                |
| <b>Group 6:</b> AHI≥10          | >3        | <b>0.855 ± 0.0413</b><br><b>0.827 to 0.880</b> | <b>0.0001</b> | <b>100.00</b><br><b>89.7 - 100.0</b> | <b>70.98</b><br><b>67.4 - 74.4</b> | <b>100</b>                          | <b>15.0</b>                         |
| <b>Group 2:</b><br>1>AHI≤2 vs.  |           |                                                |               |                                      |                                    |                                     |                                     |
| <b>Group 3:</b><br>2>AHI≤3      | >3        | 0.544 ± 0.0442<br>0.479 to 0.607               | 0.3219        | 42.11<br>29.1 - 55.9                 | 66.84<br>59.6 - 73.5               | 79.1                                | 27.9                                |
| <b>Group 4:</b><br>3>AHI≤5      | >3        | 0.658 ± 0.0434<br>0.594 to 0.717               | 0.0003        | 59.65<br>45.8 - 72.4                 | 66.84<br>59.6 - 73.5               | 84.5                                | 35.4                                |
| <b>Group 5:</b><br>5>AHI<10     | >3        | 0.681 ± 0.0449<br>0.618 to 0.740               | 0.0001        | 64.71<br>50.1 - 77.6                 | 66.84<br>59.6 - 73.5               | 87.4                                | 34.7                                |
| <b>Group 6:</b> AHI≥10          | >3        | <b>0.834 ± 0.0443</b><br><b>0.779 to 0.881</b> | <b>0.0001</b> | <b>100.00</b><br><b>89.7 - 100.0</b> | <b>66.84</b><br><b>59.6 - 73.5</b> | <b>100</b>                          | <b>35.4</b>                         |
| <b>Group 3:</b><br>2>AHI≤3 vs.  |           |                                                |               |                                      |                                    |                                     |                                     |
| <b>Group 4:</b><br>3>AHI≤5      | >2        | 0.610 ± 0.0527<br>0.514 to 0.700               | 0.0365        | 77.19<br>64.2 - 87.3                 | 42.11<br>29.1 - 55.9               | 64.9                                | 57.1                                |
| <b>Group 5:</b><br>5>AHI<10     | >3        | 0.635 ± 0.0537<br>0.537 to 0.725               | 0.0121        | 64.71<br>50.1 - 77.6                 | 57.89<br>44.1 - 70.9               | 64.7                                | 57.9                                |
| <b>Group 6:</b> AHI≥10          | >3        | <b>0.789 ± 0.0519</b><br><b>0.691 to 0.868</b> | <b>0.0001</b> | <b>100.00</b><br><b>89.7 - 100.0</b> | <b>57.89</b><br><b>44.1 - 70.9</b> | <b>100</b>                          | <b>58.6</b>                         |
| <b>Group 4:</b><br>3>AHI≤5 vs.  |           |                                                |               |                                      |                                    |                                     |                                     |
| <b>Group 5:</b><br>5>AHI<10     | >1        | 0.527 ± 0.0559<br>0.428 to 0.624               | 0.6310        | 92.16<br>81.1 - 97.8                 | 14.04<br>6.3 - 25.8                | 66.7                                | 49.0                                |
| <b>Group 6:</b> AHI≥10          | >3        | 0.702 ± 0.0585<br>0.597 to 0.793               | 0.0006        | 100.00<br>89.7 - 100.0               | 40.35<br>27.6 - 54.2               | 100                                 | 50.0                                |
| <b>Group 5:</b><br>5>AHI<10 vs. |           |                                                |               |                                      |                                    |                                     |                                     |
| <b>Group 6:</b> AHI≥10          | >3        | 0.673 ± 0.0614<br>0.563 to 0.771               | 0.0048        | 100.00<br>89.4 - 100.0               | 34.62<br>22.0 - 49.1               | 100                                 | 49.3                                |

AUC: Area Under Curve, AHI: Apnea Hypopnea Index



| <b>Daytime mouth breathing</b>  |                  |                                   |                |                                      |                                      |                                      |                                      |
|---------------------------------|------------------|-----------------------------------|----------------|--------------------------------------|--------------------------------------|--------------------------------------|--------------------------------------|
| <b>Group 1: AHI≤1 vs.</b>       | <b>Criterion</b> | <b>AUC</b><br>Mean ± SE<br>95% CI | <b>p-value</b> | <b>Sensitivity</b><br>mean<br>95% CI | <b>Specificity</b><br>mean<br>95% CI | <b>Negative Predictive Value (%)</b> | <b>Positive Predictive Value (%)</b> |
| <b>Group 2:</b>                 | >2               | 0.546 ± 0.0244                    | 0.0568         | 30.27                                | 77.22                                | 79.3                                 | 27.7                                 |
| 1>AHI≤2                         |                  | 0.512 to 0.581                    |                | 23.7 - 37.4                          | 73.8 - 80.4                          |                                      |                                      |
| <b>Group 3:</b>                 | >1               | 0.572 ± 0.0424                    | 0.0885         | 50.94                                | 63.81                                | 94.0                                 | 10.4                                 |
| 2>AHI≤3                         |                  | 0.534 to 0.609                    |                | 36.8 - 64.9                          | 60.0 - 67.5                          |                                      |                                      |
| <b>Group 4:</b>                 | >1               | 0.597 ± 0.0418                    | 0.0202         | 54.55                                | 63.81                                | 94.2                                 | 11.5                                 |
| 3>AHI≤5                         |                  | 0.560 to 0.634                    |                | 40.6 - 68.0                          | 60.0 - 67.5                          |                                      |                                      |
| <b>Group 5:</b>                 | >1               | 0.683 ± 0.0429                    | 0.0001         | 66.00                                | 63.81                                | 96.0                                 | 12.5                                 |
| 5>AHI<10                        |                  | 0.647 to 0.717                    |                | 51.2 - 78.8                          | 60.0 - 67.5                          |                                      |                                      |
| <b>Group 6: AHI≥10</b>          | >1               | <b>0.764 ± 0.0485</b>             | <b>0.0001</b>  | <b>82.35</b>                         | <b>63.81</b>                         | <b>98.6</b>                          | <b>10.8</b>                          |
|                                 |                  | <b>0.731 to 0.796</b>             |                | <b>65.5 - 93.2</b>                   | <b>60.0 - 67.5</b>                   |                                      |                                      |
| <b>Group 2:</b><br>1>AHI≤2 vs.  |                  |                                   |                |                                      |                                      |                                      |                                      |
| <b>Group 3:</b>                 | >1               | 0.523 ± 0.0454                    | 0.6187         | 50.94                                | 57.84                                | 80.5                                 | 25.7                                 |
| 2>AHI≤3                         |                  | 0.457 to 0.588                    |                | 36.8 - 64.9                          | 50.4 - 65.0                          |                                      |                                      |
| <b>Group 4:</b>                 | >1               | 0.547 ± 0.0449                    | 0.2923         | 54.55                                | 57.84                                | 81.1                                 | 27.8                                 |
| 3>AHI≤5                         |                  | 0.482 to 0.611                    |                | 40.6 - 68.0                          | 50.4 - 65.0                          |                                      |                                      |
| <b>Group 5:</b>                 | >1               | 0.631 ± 0.0464                    | 0.0048         | 66.00                                | 57.84                                | 86.3                                 | 29.7                                 |
| 5>AHI<10                        |                  | 0.565 to 0.692                    |                | 51.2 - 78.8                          | 50.4 - 65.0                          |                                      |                                      |
| <b>Group 6: AHI≥10</b>          | >1               | 0.717 ± 0.0524                    | 0.0001         | 82.35                                | 57.84                                | 94.7                                 | 26.4                                 |
|                                 |                  | 0.653 to 0.776                    |                | 65.5 - 93.2                          | 50.4 - 65.0                          |                                      |                                      |
| <b>Group 3:</b><br>2>AHI≤3 vs.  |                  |                                   |                |                                      |                                      |                                      |                                      |
| <b>Group 4:</b>                 | >2               | 0.531 ± 0.0557                    | 0.5771         | 38.18                                | 71.70                                | 52.8                                 | 58.3                                 |
| 3>AHI≤5                         |                  | 0.433 to 0.628                    |                | 25.4 - 52.3                          | 57.7 - 83.2                          |                                      |                                      |
| <b>Group 5:</b>                 | >2               | 0.620 ± 0.0553                    | 0.0297         | 52.00                                | 71.70                                | 61.3                                 | 63.4                                 |
| 5>AHI<10                        |                  | 0.519 to 0.714                    |                | 37.4 - 66.3                          | 57.7 - 83.2                          |                                      |                                      |
| <b>Group 6: AHI≥10</b>          | >2               | 0.718 ± 0.0580                    | 0.0002         | 67.65                                | 71.70                                | 77.6                                 | 60.5                                 |
|                                 |                  | 0.612 to 0.810                    |                | 49.5 - 82.6                          | 57.7 - 83.2                          |                                      |                                      |
| <b>Group 4:</b><br>3>AHI≤5 vs.  |                  |                                   |                |                                      |                                      |                                      |                                      |
| <b>Group 5:</b>                 | >2               | 0.586 ± 0.0558                    | 0.1225         | 52.00                                | 61.82                                | 58.6                                 | 55.3                                 |
| 5>AHI<10                        |                  | 0.486 to 0.681                    |                | 37.4 - 66.3                          | 47.7 - 74.6                          |                                      |                                      |
| <b>Group 6: AHI≥10</b>          | >3               | 0.688 ± 0.0595                    | 0.0016         | 50.00                                | 80.00                                | 72.1                                 | 60.7                                 |
|                                 |                  | 0.581 to 0.782                    |                | 32.4 - 67.6                          | 67.0 - 89.6                          |                                      |                                      |
| <b>Group 5:</b><br>5>AHI<10 vs. |                  |                                   |                |                                      |                                      |                                      |                                      |
| <b>Group 6: AHI≥10</b>          | >3               | 0.617 ± 0.0633                    | 0.0645         | 50.00                                | 72.00                                | 67.9                                 | 54.8                                 |
|                                 |                  | 0.505 to 0.721                    |                | 32.4 - 67.6                          | 57.5 - 83.8                          |                                      |                                      |

**AUC:** Area Under Curve, **AHI:** Apnea Hypopnea Index
